# Supplementary material for: Large-Scale Monitoring of the Frequency of Ryanodine Receptor Target-Site Mutations Conferring Diamide Resistance in Brazilian Field Populations of Fall Armyworm, Spodoptera frugiperda (Lepidoptera: Noctuidae)
Source: MDPI journal article supplement (doi:10.3390/insects13070626), 2022-07-13

## Supporting material

### Large-scale monitoring of the frequency of ryanodine receptor target-site mutations conferring diamide resistance in Brazilian field populations of fall armyworm, *Spodoptera frugiperda* (Lepidoptera: Noctuidae)

Daniela M. Okuma <sup>a,b</sup>, Ana Cuenca <sup>b</sup>, Ralf Nauen <sup>c,\*</sup>, Celso Omoto <sup>a,\*</sup>

<sup>a</sup> Department of Entomology and Acarology, University of São Paulo (ESALQ/ USP), Piracicaba, São Paulo, Brazil.

<sup>b</sup> Bayer SA, Crop Science Division, Paulínia, Brazil

<sup>c</sup> Bayer AG, Crop Science Division, R&D Pest Control, Monheim, Germany

\*Corresponding authors: [ralf.nauen@bayer.com](mailto:ralf.nauen@bayer.com), [celso.omoto@usp.br](mailto:celso.omoto@usp.br)

#### Table of contents

**Table S1.** List of populations used for phenotypic and PCR-based allelic discrimination monitoring of *Spodoptera frugiperda* populations sampled from season 2018/19 to 2020/21.

**Table S2.** List of populations used for genotypic (F<sub>2</sub> Screen) of *Spodoptera frugiperda* populations sampled from season 2018/19 to 2020/21.

**Table S3.** List of primers and probes used for fluorescent PCR-based allelic discrimination assay.

**Table S4.** Genotyping of the frequency of RyR resistance alleles using a PCR-based assay in field populations of *Spodoptera frugiperda* sampled across seasons between 2019 and 2021. 4790 I/I, homozygous susceptible; 4790 M/M, homozygous resistant; 4790I/M and 4790 M/K, heterozygotes.

**Figure S1.** Map displaying the geographic origin of the *Spodoptera frugiperda* populations sampled across seasons.

**Figure S2.** Phenotyping of diamide resistance in Brazilian *Spodoptera frugiperda* across seasons. Efficacy of a discriminating rate of flubendiamide (diet-overlay assay, 0.41 µg a.i./cm<sup>2</sup>) against 70 field populations of fall armyworm collected in 2019 (A), 2020 (B), 2021 (C), and a summary across seasons (D). Data are mean values ± CI95% (n=4).

**Figure S3.** Representative Sanger sequencing traces of the amplified PCR products for genotyping respective mutations at ryanodine receptor (RyR) position I4790 (P. xylostella RyR numbering; GenBank AET09964) in individual adults of flubendiamide-selected *Spodoptera frugiperda* strains BA-R and TF-R. The position of the I4790 mutation site is boxed. In strain BAR only one genotype was detected, I4790M. Whereas in TF-R three genotypes were found, M4790 homozygotes, K4790 homozygotes and K/M4790 heterozygotes.

**Figure S4.** Insecticide use for lepidopteran pest control in different crops in Brazil. Number of insecticide sprays (2015-2021) and market share of important chemical classes of insecticides (2016-2021) used to manage lepidopteran larvae across states and seasons in Brazilian soybean (A), cotton (B) and corn (C). Data were obtained from BIP Spark (maize 2015-2018, soybean 2015-2021, cotton 2015-2018, 2020-2021) and Kynetec (maize 2019-2021; cotton 2019).

**Table S1.** List of populations used for phenotypic and PCR-based allelic discrimination monitoring of *Spodoptera frugiperda* populations sampled from season 2018/19 to 2020/21.

| Year    | Location                  | Season     | Crop    | Latitude         | Longitude        |
|---------|---------------------------|------------|---------|------------------|------------------|
| 2018/19 | Santo Ângelo, RS          | 1st        | Maize   | 28° 06' 15.59" S | 54° 25' 33.20" W |
| 2018/19 | Selbach, SC               | 1st        | Maize   | 28° 36' 46.93" S | 52° 56' 36.06" W |
| 2018/19 | Toledo, PR                | 1st        | Maize   | 24° 52' 51.70" S | 53° 35' 46.07" W |
| 2018/19 | Ponta Grossa, PR          | 1st        | Maize   | 24° 35' 5.87" S  | 49° 41' 47.96" W |
| 2018/19 | Cristalina, GO            | 1st        | Maize   | 16° 58' 49.76" S | 47° 38' 28.33" W |
| 2018/19 | Santa Helena de Goiás, GO | 1st        | Maize   | 17° 40' 21.56" S | 50° 39' 20.32" W |
| 2018/19 | Chapecó, SC               | 1st        | Maize   | 27° 11' 39.01" S | 52° 39' 32.00" W |
| 2018/19 | Luis E. Magalhães, BA     | 1st        | Maize   | 11° 38' 55.13" S | 45° 31' 1.10" W  |
| 2018/19 | Araguari, MG              | 1st        | Maize   | 18° 33' 47.52" S | 47° 25' 12.90" W |
| 2018/19 | Casa Branca, SP           | 1st        | Maize   | 21° 32' 5.49" S  | 47° 04' 28.92" W |
| 2018/19 | Toledo, PR                | 2nd        | Maize   | 24° 38' 52.27" S | 53° 42' 39.65" W |
| 2018/19 | Campo Mourão, PR          | 2nd        | Maize   | 24° 01' 41.67" S | 52° 19' 5.56" W  |
| 2018/19 | Casa Branca, SP           | 2nd        | Maize   | 21° 45' 0.69" S  | 47° 8' 9.39" W   |
| 2018/19 | Araguari, MG              | 2nd        | Maize   | 18° 33' 47.52" S | 47° 25' 12.90" W |
| 2018/19 | Chapadão do Sul, MS       | 2nd        | Maize   | 18° 44' 13.96" S | 52° 32' 8.74" W  |
| 2018/19 | Lucas do Rio Verde, MT    | 2nd        | Maize   | 12° 55' 36.64" S | 56° 03' 13.73" W |
| 2018/19 | Campo Verde, MT           | 2nd        | Maize   | 15° 23' 14.16" S | 55° 05' 46.11" W |
| 2018/19 | Cristalina, GO            | 2nd        | Maize   | 17° 48' 24.11" S | 50° 48' 12.13" W |
| 2018/19 | Rio Verde, GO             | 2nd        | Maize   | 17° 48' 24.11" S | 50° 48' 12.13" W |
| 2018/19 | Casa Branca, SP           | Off-season | Maize   | 21° 54' 43.75" S | 47° 08' 29.39" W |
| 2018/19 | Lucas do Rio Verde, MT    | Off-season | Maize   | 12° 58' 44.45" S | 55° 52' 24.91" W |
| 2018/19 | Rio Verde, GO             | Off-season | Maize   | 17° 45' 5.85" S  | 50° 32' 52.03" W |
| 2018/19 | Correntina, BA            | Off-season | Maize   | 13° 23' 57.23" S | 45° 52' 50.09" W |
| 2019/20 | Coronel Barros, RS        | 1st        | Maize   | 28°22'54.59" S   | 54°00'52.56" W   |
| 2019/20 | Selbach, RS               | 1st        | Maize   | 28°38'45.28" S   | 53°00'17.50" W   |
| 2019/20 | Chapecó, SC               | 1st        | Maize   | 27°11'38.11" S   | 52°37'31.86" W   |
| 2019/20 | Corbélia, PR              | 1st        | Maize   | 24°50'46.36" S   | 53°19'10.86" W   |
| 2019/20 | Tibagi, PR                | 1st        | Maize   | 24°27'9.86" S    | 50°11'24.90" W   |
| 2019/20 | Pirassununga, SP          | 1st        | Sorghum | 21°53'56.01" S   | 47°21'10.87" W   |
| 2019/20 | Uberlândia, MG            | 1st        | Sorghum | 19°10'49.32" S   | 48°09'16.56" W   |
| 2019/20 | Santa Helena de Goiás, GO | 1st        | Sorghum | 17°45'13.68" S   | 50°35'12.19" W   |
| 2019/20 | Cristalina, GO            | 1st        | Maize   | 16°27'07.21" S   | 47°37'48.60" W   |
| 2019/20 | Casa Branca, SP           | 2nd        | Maize   | 21°54'45.2" S    | 47°10'52.52" W   |
| 2019/20 | Londrina, PR              | 2nd        | Maize   | 23°20'26.26.9" S | 51°14'04.6" W    |
| 2019/20 | Cascavel, PR              | 2nd        | Maize   | 24°36'26.2" S    | 53°17'40.6" W    |
| 2019/20 | Mamborê, PR               | 2nd        | Maize   | 24°19'04.80" S   | 52°35'23.7" W    |
| 2019/20 | Dourados, MS              | 2nd        | Maize   | 22°03'43" S      | 54°54'37" W      |
| 2019/20 | Chapadão do Sul, MS       | 2nd        | Maize   | 18°42'57" S      | 52°45'32" W      |
| 2019/20 | Lucas do Rio Verde, MT    | 2nd        | Maize   | 12°59'36.27" S   | 55°50'06.40" W   |
| 2019/20 | Sapezal, MT               | 2nd        | Maize   | 12°26'54.42" S   | 59°15'06.33" W   |
| 2019/20 | Campo Verde, MT           | 2nd        | Maize   | 15°32'40.28" S   | 55°12'09.48" W   |
| 2019/20 | Rio Verde, GO             | 2nd        | Maize   | 17°48'03.43" S   | 50°24'59.66" W   |
| 2019/20 | Campo Novo do Parecis, MT | Off-season | Cotton  | 11°42'56.16" S   | 55°18'44.74" W   |
| 2019/20 | Campo Verde, MT           | Off-season | Cotton  | 15°33'53.90" S   | 55°11'27.20" W   |
| 2019/20 | Roda Velha, BA            | Off-season | Cotton  | 12°40'33.56" S   | 45°58'00.90" W   |
| 2019/20 | Luis E. Magalhães, BA     | Off-season | Cotton  | 11°41'47.28" S   | 46°00'17.46" W   |
| 2019/20 | Jaborandi, BA             | Off-season | Cotton  | 14°14'33.36" S   | 45°26'32.52" W   |

|         |                           |            |        |                 |                  |
|---------|---------------------------|------------|--------|-----------------|------------------|
| 2020/21 | Santo Ângelo, RS          | 1st        | Maize  | 28°28'50.40" S  | 54°20'16.90" W   |
| 2020/21 | Chapecó, SC               | 1st        | Maize  | 27°05'19" S     | 52°38'13" W      |
| 2020/21 | Selbach, SC               | 1st        | Maize  | 28°38'33.70" S  | 52°57'05.20" W   |
| 2020/21 | Cascavel, PR              | 1st        | Maize  | 25°02'12.48" S  | 53°04'12.61" W   |
| 2020/21 | Piraí do Sul, PR          | 1st        | Maize  | 24°27'40.84" S  | 50°10'38.84" W   |
| 2020/21 | Casa Branca, SP           | 1st        | Maize  | 21°48'05.46" S  | 46°55'54.99" W   |
| 2020/21 | Araguari, MG              | 1st        | Maize  | 18°43'54.43" S  | 47°58'41.06" W   |
| 2020/21 | Santa Helena de Goiás, GO | 1st        | Maize  | 17°41'21.17" S  | 50°39'09.68" W   |
| 2020/21 | Cristalina, GO            | 1st        | Maize  | 16°28'08.58" S  | 47°39'11.72" W   |
| 2020/21 | Luis E. Magalhães, BA     | 1st        | Maize  | 12°05'40.82" S  | 45°42'41.54" W   |
| 2020/21 | Campo Mourão, PR          | 2nd        | Maize  | 24°02'11.52" S  | 52°18'37.14" W   |
| 2020/21 | Londrina, PR              | 2nd        | Maize  | 23°19'46.21" S  | 51°18'19.93" W   |
| 2020/21 | Cascavel, PR              | 2nd        | Maize  | 24°21'51.21" S  | 53°33'38.10" W   |
| 2020/21 | Dourados, MS              | 2nd        | Maize  | 22°11'49.02" S  | 54°42'42.98" W   |
| 2020/21 | Chapadão do Sul, MS       | 2nd        | Maize  | 18°43'55.58" S  | 52°30'48.33" W   |
| 2020/21 | Lucas do Rio Verde, MT    | 2nd        | Maize  | 13°01'51.74" S  | 55°53'52.28" W   |
| 2020/21 | Sapezal, MT               | 2nd        | Maize  | 13°28'52.18" S  | 59°16'16.98" W   |
| 2020/21 | Campo Verde, MT           | 2nd        | Maize  | 15°15'13.70" S  | 55°02'23.27" W   |
| 2020/21 | Rio Verde, GO             | 2nd        | Maize  | 17°48'03.43" S  | 50°24'59.66" W   |
| 2020/21 | São Desidério, BA         | Off-season | Cotton | 12° 40'33.56" S | 45° .58'00.90" W |

**Table S2.** List of populations used for genotypic (F<sub>2</sub> Screen) of *Spodoptera frugiperda* populations sampled from season 2018/19 to 2020/21.

| Season  | Location                   | Crop  | Latitude        | Longitude        | Resistance allele frequency | 95% IC             |
|---------|----------------------------|-------|-----------------|------------------|-----------------------------|--------------------|
| 2018/19 | Tasso Fragoso, MA          | Maize | 7°49'33.8" S    | 46°00'22.6" W    | 0.0430                      | 0.0248 - 0.0658    |
| 2018/19 | Luis Eduardo Magalhães, BA | Maize | 13°19'31.6" S   | 46°05'57.3 W     | 0.1023                      | 0.0729 - 0.1359    |
| 2018/19 | Campo Verde, MT            | Maize | 15°30'53" S     | 55°12'25" W      | 0.0485                      | 0.0317 - 0.0685    |
| 2018/19 | Lucas do Rio Verde, MT     | Maize | 12°48'15" S     | 56°25'40" W      | 0.0240                      | 0.0116 - 0.0408    |
| 2018/19 | Chapadão do Sul, MS        | Maize | 18°42'52.6" S   | 52°36'23.5" W    | 0.0167                      | 0.0021 - 0.0460    |
| 2018/19 | Ponta Porã, MS             | Maize | 22°24'50.9" S   | 55°19'18.4" W    | 0.0119                      | 0.0015 - 0.0330    |
| 2018/19 | Rio Brilhante, MS          | Maize | 21°42'37.4" S   | 54°39'09.8" W    | 0.0482                      | 0.0279 - 0.0734    |
| 2018/19 | Rio Verde, GO              | Maize | 17°48'49.8" S   | 50°39'30.2" W    | 0.0489                      | 0.0317 - 0.0685    |
| 2018/19 | Araguari, MG               | Maize | 18°40'23.9" S   | 48°09'27.1" W    | 0.0606                      | 0.0352 - 0.0924    |
| 2018/19 | Casa Branca, SP            | Maize | 21°50'03.8" S   | 46°58'50.7" W    | 0.0121                      | 0.0045 - 0.0234    |
| 2018/19 | Campo Mourão, PR           | Maize | 23°45'24.908" S | 52°13'10.902" W  | 0.0396                      | 0.0228 - 0.0606    |
| 2018/19 | Londrina, PR               | Maize | 22°55'35.501" S | 50°54' 3.6" W    | 0.0577                      | 0.0328 - 0.0891    |
| 2019/20 | Serra do Coceiral, BA      | Maize | 10°37'53,541" S | 45°45' 59,756" W | 0.0635                      | 0.03755 - 0.09553  |
| 2019/20 | Campo Verde, MT            | Maize | 15°38'25,736" S | 55°14'44,977" W  | 0.0210                      | 0.00056 - 0.07588  |
| 2019/20 | Lucas do Rio Verde, MT     | Maize | 13°17'24,515" S | 55°38'50,917" W  | 0.0068                      | 0.00018 - 0.024919 |
| 2019/20 | Maracaju, MS               | Maize | 22°9'32,573" S  | 54°38'42,594" W  | 0.0485                      | 0.01816 - 0.09241  |
| 2019/20 | Ponta Porã, MS             | Maize | 22°27'8,042" S  | 55°20'33,054" W  | 0.0211                      | 0.00970 - 0.03661  |
| 2019/20 | Formosa, GO                | Maize | 14°55'46,255" S | 47°35'54,942" W  | 0.0345                      | 0.01510 - 0.06149  |
| 2019/20 | Araguari, MG               | Maize | 23°45'24.9" S   | 48°09'27.10" W   | 0.0630                      | 0.00176 - 0.21892  |
| 2019/20 | Casa Branca, SP            | Maize | 21°48'18,093" S | 47°10'57,058" W  | 0.1112                      | 0.05994 - 0.17658  |
| 2019/20 | Campo Mourão, PR           | Maize | 24°19'04,80" S  | 52°35'23,7" W    | 0.0098                      | 0.00270 - 0.02142  |
| 2019/20 | Londrina, PR               | Maize | 22°59'31,725" S | 51°0'34,043" W   | 0.0070                      | 0.00018 - 0.02561  |
| 2020/21 | Balsas, MA                 | Maize | 7°49'33.8" S    | 46°00'22.6" W    | 0.0635                      | 0.03755 - 0.09553  |
| 2020/21 | Campo Verde, MT            | Maize | 15°30'53.0" S   | 55°12'25.0" W    | 0.0210                      | 0.00056 - 0.07588  |
| 2020/21 | Lucas do Rio Verde, MT     | Maize | 12°48'15.0" S   | 56°25'40.0" W    | 0.0068                      | 0.00018 - 0.024919 |
| 2020/21 | Maracaju, MS               | Maize | 22°55'35.5" S   | 54°39'09.8" W    | 0.0485                      | 0.01816 - 0.09241  |
| 2020/21 | Ponta Porã, MS             | Maize | 22°24'50.9" S   | 55°19'18.4" W    | 0.0211                      | 0.00970 - 0.03661  |
| 2020/21 | Rio Verde, GO              | Maize | 17°48'49.8" S   | 50°39'30.2" W    | 0.0345                      | 0.01510 - 0.06149  |
| 2020/21 | Araguari, MG               | Maize | 23°45'24.9" S   | 48°09'27.10" W   | 0.0630                      | 0.00176 - 0.21892  |
| 2020/21 | Campo Mourão, PR           | Maize | 18°40'23.9" S   | 52°13'10.9" W    | 0.1112                      | 0.05994 - 0.17658  |
| 2020/21 | Londrina, PR               | Maize | 21°42'37" S     | 50°54'03.6" W    | 0.0098                      | 0.00270 - 0.02142  |

**Table S3.** List of primers and probes used for PCR-based allelic discrimination assays

| Primer           | Sequence                                |
|------------------|-----------------------------------------|
| Sf.taq_4790_F    | 5'-ACGACGATGCACTAGAAG-3'                |
| Sf.taq_4790_R    | 5'-CACCTTGAGATGATAGTACC-3'              |
| Sf.4790I_sus_FAM | 5'-[FAM]TGTCGCTCGCTATACTCATCG[BHQ1]-3'  |
| Sf.4790M_mut_VIC | 5'-[6VIC]CTCGCTATGCTCATCGGGT[BHQ1]-3'   |
| Sf.4790K_mut_VIC | 5'-[6VIC]TGCTCGCTAAACTCATCGGGT[BHQ1]-3' |
| Sf. 1-F          | 5'-TCAAGGTGGCTGCAGTACTG-3'              |
| Sf. 2-F          | 5'-GCCATCGAAGCTGAGAGCAA-3'              |
| Sf. 3-F          | 5'-AGGCAGCAAGGGACTGATTC-3'              |
| Sf. 1-R          | 5'-GTTCTGTTGACCTCGTCGT-3'               |
| Sf. 2-R          | 5'-GAAGAAGTCCCAGCATCGCT-3'              |

**Table S4.** Genotyping of the frequency of RyR resistance alleles using a PCR-based assay in field populations of *Spodoptera frugiperda* sampled across seasons between

2019 and 2021. 4790 I/I, homozygous susceptible; 4790 M/M and K/K, homozygous resistant; 4790 I/M, 4790 I/K and 4790 M/K, heterozygotes.

| Year | City                   | State | Season     | N  | 4790 I/I | 4790 I/M | 4790 M/M | 4790 M/K | F    | X <sup>2</sup> | P-value | 4790 I/I | 4790 I/K | 4790 K/K | 4790 M/K | F    | X <sup>2</sup> | P-value |
|------|------------------------|-------|------------|----|----------|----------|----------|----------|------|----------------|---------|----------|----------|----------|----------|------|----------------|---------|
| 2019 | Selbach                | RS    | 1st        | 20 | 100%     | 0%       | 0%       | 0%       | 0,00 | 0,00           | 1,00    | 100%     | 0%       | 0%       | 0%       | 0,00 | 0,00           | 1,00    |
| 2019 | Santo Ângelo           | RS    | 1st        | 18 | 100%     | 0%       | 0%       | 0%       | 0,00 | 0,00           | 1,00    | 100%     | 0%       | 0%       | 0%       | 0,00 | 0,00           | 1,00    |
| 2019 | Toledo                 | PR    | 1st        | 19 | 90%      | 10%      | 0%       | 0%       | 0,05 | 0,05           | 0,82    | 90%      | 0%       | 0%       | 0%       | 0,00 | 0,19           | 0,66    |
| 2019 | Ponta Grossa           | PR    | 1st        | 18 | 100%     | 0%       | 0%       | 0%       | 0,00 | 0,00           | 1,00    | 100%     | 0%       | 0%       | 0%       | 0,00 | 0,00           | 1,00    |
| 2019 | Cristalina             | GO    | 1st        | 8  | 100%     | 0%       | 0%       | 0%       | 0,00 | 0,00           | 1,00    | 100%     | 0%       | 0%       | 0%       | 0,00 | 0,00           | 1,00    |
| 2019 | Luis Eduardo Magalhães | BA    | 1st        | 17 | 71%      | 24%      | 6%       | 0%       | 0,18 | 0,62           | 0,43    | 71%      | 0%       | 0%       | 0%       | 0,00 | 1,47           | 0,23    |
| 2019 | Chapecó                | SC    | 1st        | 16 | 100%     | 0%       | 0%       | 0%       | 0,00 | 0,00           | 1,00    | 100%     | 0%       | 0%       | 0%       | 0,00 | 0,00           | 1,00    |
| 2019 | Santa Helena de Goiás  | GO    | 1st        | 18 | 83%      | 17%      | 0%       | 0%       | 0,08 | 0,15           | 0,70    | 83%      | 0%       | 0%       | 0%       | 0,00 | 0,50           | 0,48    |
| 2019 | Araguari               | MG    | 1st        | 10 | 90%      | 10%      | 0%       | 0%       | 0,05 | 0,03           | 0,87    | 90%      | 0%       | 0%       | 0%       | 0,00 | 0,10           | 0,75    |
| 2019 | Casa Branca            | SP    | 1st        | 19 | 95%      | 5%       | 0%       | 0%       | 0,03 | 0,01           | 0,91    | 95%      | 0%       | 0%       | 0%       | 0,00 | 0,05           | 0,83    |
| 2019 | Toledo                 | PR    | 2nd        | 19 | 100%     | 0%       | 0%       | 0%       | 0,00 | 0,00           | 1,00    | 100%     | 0%       | 0%       | 0%       | 0,00 | 0,00           | 1,00    |
| 2019 | Lucas do Rio Verde     | MT    | 2nd        | 19 | 85%      | 15%      | 0%       | 0%       | 0,08 | 0,12           | 0,72    | 85%      | 0%       | 0%       | 0%       | 0,00 | 0,43           | 0,51    |
| 2019 | Sapezal                | MT    | 2nd        | 20 | 85%      | 15%      | 0%       | 0%       | 0,08 | 0,13           | 0,72    | 85%      | 0%       | 0%       | 0%       | 0,00 | 0,45           | 0,50    |
| 2019 | Campo Mourão           | PR    | 2nd        | 19 | 100%     | 0%       | 0%       | 0%       | 0,00 | 0,00           | 1,00    | 100%     | 0%       | 0%       | 0%       | 0,00 | 0,00           | 1,00    |
| 2019 | Londrina               | PR    | 2nd        | 20 | 100%     | 0%       | 0%       | 0%       | 0,00 | 0,00           | 1,00    | 100%     | 0%       | 0%       | 0%       | 0,00 | 0,00           | 1,00    |
| 2019 | Chapadão do Sul        | MS    | 2nd        | 20 | 80%      | 20%      | 0%       | 0%       | 0,10 | 0,25           | 0,62    | 80%      | 0%       | 0%       | 0%       | 0,00 | 0,80           | 0,37    |
| 2019 | Dourados               | MS    | 2nd        | 20 | 75%      | 20%      | 5%       | 0%       | 0,15 | 0,93           | 0,33    | 75%      | 0%       | 0%       | 0%       | 0,00 | 1,25           | 0,26    |
| 2019 | Casa Branca            | SP    | 2nd        | 20 | 75%      | 25%      | 0%       | 0%       | 0,13 | 0,41           | 0,52    | 75%      | 0%       | 0%       | 0%       | 0,00 | 1,25           | 0,26    |
| 2019 | Campo Verde            | MT    | 2nd        | 18 | 94%      | 6%       | 0%       | 0%       | 0,03 | 0,01           | 0,90    | 94%      | 0%       | 0%       | 0%       | 0,00 | 0,06           | 0,81    |
| 2019 | Rio Verde              | GO    | 2nd        | 20 | 80%      | 20%      | 0%       | 0%       | 0,10 | 0,25           | 0,62    | 80%      | 0%       | 0%       | 0%       | 0,00 | 0,80           | 0,37    |
| 2019 | Correntina             | BA    | Off-season | 19 | 68%      | 16%      | 10%      | 0%       | 0,19 | 3,53           | 0,06    | 68%      | 5%       | 0%       | 0%       | 0,04 | 1,38           | 0,24    |
| 2019 | Santa Helena de Goiás  | GO    | Off-season | 17 | 82%      | 18%      | 0%       | 0%       | 0,09 | 0,16           | 0,69    | 82%      | 0%       | 0%       | 0%       | 0,00 | 0,53           | 0,47    |
| 2019 | Lucas do Rio Verde     | MT    | Off-season | 20 | 95%      | 5%       | 0%       | 0%       | 0,03 | 0,01           | 0,91    | 95%      | 0%       | 0%       | 0%       | 0,00 | 0,05           | 0,82    |
| 2019 | Chapadão do Sul        | MS    | Off-season | 20 | 95%      | 5%       | 0%       | 0%       | 0,03 | 0,01           | 0,91    | 95%      | 0%       | 0%       | 0%       | 0,00 | 0,05           | 0,82    |
| 2020 | Santo Ângelo           | RS    | 1st        | 20 | 100%     | 0%       | 0%       | 0%       | 0,00 | 0,00           | 1,00    | 100%     | 0%       | 0%       | 0%       | 0,00 | 0,00           | 1,00    |
| 2020 | Selbach                | RS    | 1st        | 20 | 100%     | 0%       | 0%       | 0%       | 0,00 | 0,00           | 1,00    | 100%     | 0%       | 0%       | 0%       | 0,00 | 0,00           | 1,00    |
| 2020 | Pirassununga           | SP    | 1st        | 20 | 95%      | 5%       | 0%       | 0%       | 0,03 | 0,01           | 0,91    | 95%      | 0%       | 0%       | 0%       | 0,00 | 0,05           | 0,82    |
| 2020 | Tibagi                 | PR    | 1st        | 20 | 90%      | 10%      | 0%       | 0%       | 0,05 | 0,06           | 0,81    | 90%      | 0%       | 0%       | 0%       | 0,00 | 0,20           | 0,65    |
| 2020 | Cascavel               | PR    | 1st        | 21 | 100%     | 0%       | 0%       | 0%       | 0,00 | 0,00           | 1,00    | 100%     | 0%       | 0%       | 0%       | 0,00 | 0,00           | 1,00    |
| 2020 | Chapecó                | SC    | 1st        | 6  | 100%     | 0%       | 0%       | 0%       | 0,00 | 0,00           | 1,00    | 100%     | 0%       | 0%       | 0%       | 0,00 | 0,00           | 1,00    |
| 2020 | Cristalina             | GO    | 1st        | 10 | 100%     | 0%       | 0%       | 0%       | 0,00 | 0,00           | 1,00    | 100%     | 0%       | 0%       | 0%       | 0,00 | 0,00           | 1,00    |
| 2020 | Uberlândia             | MG    | 1st        | 20 | 95%      | 5%       | 0%       | 0%       | 0,03 | 0,01           | 0,91    | 95%      | 0%       | 0%       | 0%       | 0,00 | 0,05           | 0,82    |
| 2020 | Luis Eduardo Magalhães | BA    | 1st        | 21 | 90%      | 0%       | 0%       | 0%       | 0,00 | 0,21           | 0,65    | 90%      | 5%       | 5%       | 0%       | 0,08 | 8,59           | 0,00    |
| 2020 | Lucas do Rio Verde     | MT    | 2nd        | 20 | 90%      | 10%      | 0%       | 0%       | 0,05 | 0,06           | 0,81    | 90%      | 0%       | 0%       | 0%       | 0,00 | 0,20           | 0,65    |
| 2020 | Campo Verde            | MT    | 2nd        | 19 | 100%     | 0%       | 0%       | 0%       | 0,00 | 0,00           | 1,00    | 100%     | 0%       | 0%       | 0%       | 0,00 | 0,00           | 1,00    |
| 2020 | Casa Branca            | SP    | 2nd        | 15 | 60%      | 27%      | 7%       | 0%       | 0,21 | 0,37           | 0,54    | 60%      | 7%       | 0%       | 0%       | 0,05 | 1,69           | 0,19    |
| 2020 | Sapezal                | MT    | 2nd        | 17 | 100%     | 0%       | 0%       | 0%       | 0,00 | 0,00           | 1,00    | 100%     | 0%       | 0%       | 0%       | 0,00 | 0,00           | 1,00    |
| 2020 | Londrina               | PR    | 2nd        | 20 | 100%     | 0%       | 0%       | 0%       | 0,00 | 0,00           | 1,00    | 100%     | 0%       | 0%       | 0%       | 0,00 | 0,00           | 1,00    |
| 2020 | Cascavel               | PR    | 2nd        | 8  | 75%      | 13%      | 13%      | 0%       | 0,19 | 2,78           | 0,10    | 75%      | 0%       | 0%       | 0%       | 0,00 | 0,50           | 0,48    |
| 2020 | Chapadão do Sul        | MS    | 2nd        | 21 | 100%     | 0%       | 0%       | 0%       | 0,00 | 0,00           | 1,00    | 100%     | 0%       | 0%       | 0%       | 0,00 | 0,00           | 1,00    |
| 2020 | Campo Novo do Parecis  | MT    | Off-season | 20 | 75%      | 15%      | 10%      | 0%       | 0,18 | 4,62           | 0,03    | 75%      | 0%       | 0%       | 0%       | 0,00 | 1,25           | 0,26    |

|      |                        |    |            |    |      |     |     |    |      |       |      |      |     |    |    |      |      |      |
|------|------------------------|----|------------|----|------|-----|-----|----|------|-------|------|------|-----|----|----|------|------|------|
| 2020 | Barreiras              | BA | Off-season | 19 | 84%  | 11% | 5%  | 0% | 0,11 | 3,70  | 0,05 | 84%  | 0%  | 0% | 0% | 0,00 | 0,47 | 0,49 |
| 2020 | Campo Verde            | MT | Off-season | 21 | 90%  | 10% | 0%  | 0% | 0,05 | 0,05  | 0,82 | 90%  | 0%  | 0% | 0% | 0,00 | 0,19 | 0,66 |
| 2020 | Jaborandi              | BA | Off-season | 14 | 86%  | 14% | 0%  | 0% | 0,07 | 0,08  | 0,77 | 86%  | 0%  | 0% | 0% | 0,00 | 0,29 | 0,59 |
| 2021 | Selbach                | RS | 1st        | 20 | 100% | 0%  | 0%  | 0% | 0,00 | 0,00  | 1,00 | 100% | 0%  | 0% | 0% | 0,00 | 0,00 | 1,00 |
| 2021 | Santo Ângelo           | RS | 1st        | 18 | 100% | 0%  | 0%  | 0% | 0,00 | 0,00  | 1,00 | 100% | 0%  | 0% | 0% | 0,00 | 0,00 | 1,00 |
| 2021 | Casa Branca            | SP | 1st        | 20 | 95%  | 0%  | 0%  | 0% | 0,00 | 0,05  | 0,82 | 95%  | 5%  | 0% | 0% | 0,03 | 0,01 | 0,91 |
| 2021 | Santa Helena de Goiás  | GO | 1st        | 20 | 95%  | 5%  | 0%  | 0% | 0,03 | 0,01  | 0,91 | 95%  | 0%  | 0% | 0% | 0,00 | 0,05 | 0,82 |
| 2021 | Ponta Grossa           | PR | 1st        | 20 | 100% | 0%  | 0%  | 0% | 0,00 | 0,00  | 1,00 | 100% | 0%  | 0% | 0% | 0,00 | 0,00 | 1,00 |
| 2021 | Cascavel               | PR | 1st        | 20 | 100% | 0%  | 0%  | 0% | 0,00 | 0,00  | 1,00 | 100% | 0%  | 0% | 0% | 0,00 | 0,00 | 1,00 |
| 2021 | Chapecó                | SC | 1st        | 20 | 100% | 0%  | 0%  | 0% | 0,00 | 0,00  | 1,00 | 100% | 0%  | 0% | 0% | 0,00 | 0,00 | 1,00 |
| 2021 | Araguari               | MG | 1st        | 20 | 90%  | 5%  | 5%  | 0% | 0,08 | 8,18  | 0,00 | 90%  | 0%  | 0% | 0% | 0,00 | 0,20 | 0,65 |
| 2021 | Luis Eduardo Magalhães | BA | 1st        | 20 | 70%  | 10% | 10% | 0% | 0,17 | 6,03  | 0,01 | 70%  | 10% | 0% | 0% | 0,06 | 0,86 | 0,35 |
| 2021 | Chapadão do Sul        | MS | 2nd        | 20 | 90%  | 0%  | 10% | 0% | 0,10 | 20,00 | 0,00 | 90%  | 0%  | 0% | 0% | 0,00 | 0,20 | 0,65 |
| 2021 | Dourados               | MS | 2nd        | 20 | 100% | 0%  | 0%  | 0% | 0,00 | 0,00  | 1,00 | 100% | 0%  | 0% | 0% | 0,00 | 0,00 | 1,00 |
| 2021 | Campo Mourão           | PR | 2nd        | 20 | 100% | 0%  | 0%  | 0% | 0,00 | 0,00  | 1,00 | 100% | 0%  | 0% | 0% | 0,00 | 0,00 | 1,00 |
| 2021 | Rio Verde              | GO | 2nd        | 20 | 85%  | 10% | 5%  | 0% | 0,10 | 3,95  | 0,05 | 85%  | 0%  | 0% | 0% | 0,00 | 0,45 | 0,50 |
| 2021 | Casa Branca            | SP | 2nd        | 20 | 90%  | 0%  | 0%  | 0% | 0,00 | 0,20  | 0,65 | 90%  | 10% | 0% | 0% | 0,05 | 0,06 | 0,81 |
| 2021 | Lucas do Rio Verde     | MT | 2nd        | 20 | 80%  | 15% | 5%  | 0% | 0,13 | 1,98  | 0,16 | 80%  | 0%  | 0% | 0% | 0,00 | 0,80 | 0,37 |
| 2021 | Sapezal                | MT | 2nd        | 20 | 90%  | 5%  | 5%  | 0% | 0,08 | 8,18  | 0,00 | 90%  | 0%  | 0% | 0% | 0,00 | 0,20 | 0,65 |
| 2021 | Campo Verde            | MT | 2nd        | 20 | 80%  | 5%  | 10% | 0% | 0,13 | 10,74 | 0,00 | 80%  | 0%  | 5% | 0% | 0,06 | 2,45 | 0,12 |
| 2021 | Cascavel               | PR | 2nd        | 20 | 95%  | 5%  | 0%  | 0% | 0,03 | 0,01  | 0,91 | 95%  | 0%  | 0% | 0% | 0,00 | 0,05 | 0,82 |
| 2021 | Londrina               | PR | 2nd        | 19 | 100% | 0%  | 0%  | 0% | 0,00 | 0,00  | 1,00 | 100% | 0%  | 0% | 0% | 0,00 | 0,00 | 1,00 |
| 2021 | São Desidério          | BA | Off-season | 19 | 42%  | 26% | 20% | 0% | 0,38 | 2,23  | 0,13 | 42%  | 11% | 0% | 0% | 0,10 | 4,33 | 0,04 |

**Figure S1.** Map displaying the geographic origin of the FAW populations sampled across seasons.

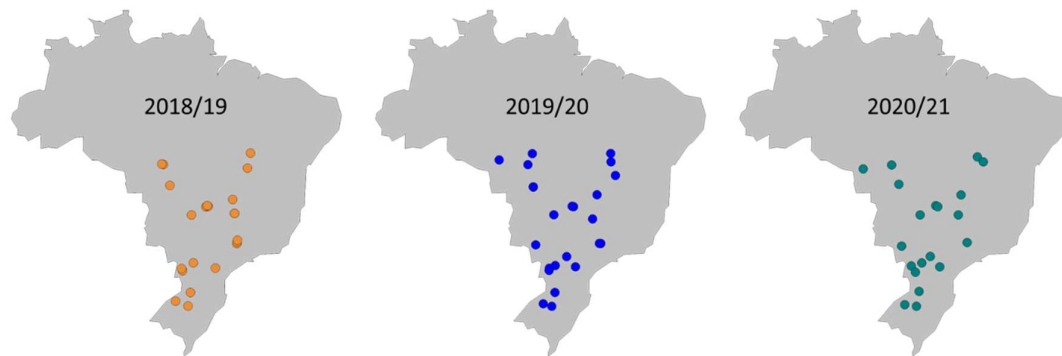



**Figure S2.** Phenotyping of diamide resistance in Brazilian *Spodoptera frugiperda* across seasons. Efficacy of a discriminating rate of flubendiamide (diet-overlay assay, 0.41  $\mu\text{g a.i./cm}^2$ ) against field populations of fall armyworm collected in 2019 (A), 2020 (B), 2021 (C), and a summary across seasons (D). Data are mean values  $\pm$  CI95% (n=4).

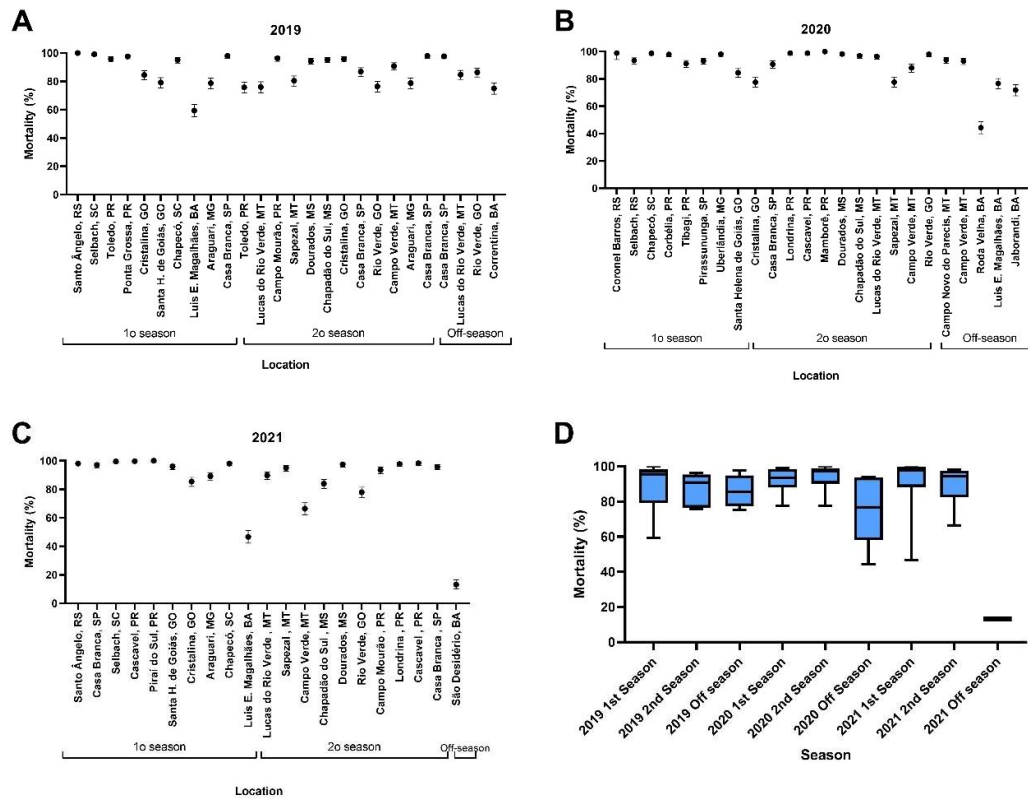

**Figure S3.** Representative Sanger sequencing traces of the amplified PCR products for genotyping respective mutations at ryanodine receptor (RyR) position I4790 (*P. xylostella* RyR numbering; GenBank AET09964) in individual adults of flubendiamide-selected *Spodoptera frugiperda* strains BA-R and TF-R. The position of the I4790 mutation site is boxed. In strain BA-R only one genotype was detected, I4790M. Whereas in TF-R three genotypes were found, M4790 homozygotes, K4790 homozygotes and K/M4790 heterozygotes.

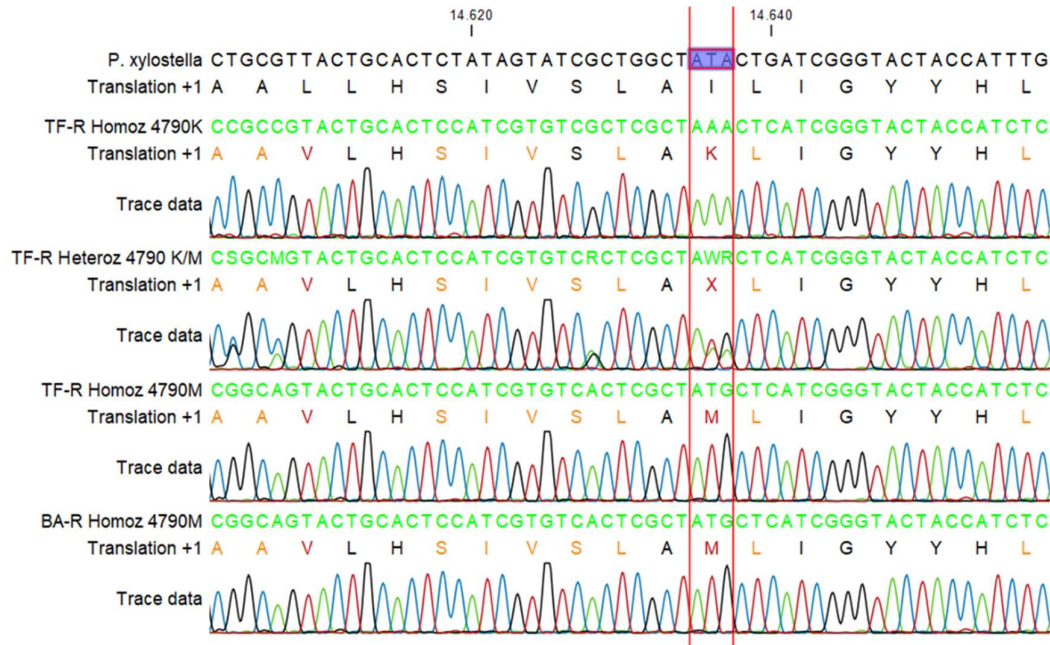

**Figure S4.** Insecticide use for lepidopteran pest control in different crops in Brazil. Number of insecticide sprays (2015-2021) and market share of important chemical classes of insecticides (2016-2021) used to manage lepidopteran larvae across states and seasons in Brazilian soybean (A), cotton (B) and corn (C). Data were obtained from BIP Spark (maize 2015-2018, soybean 2015-2021, cotton 2015-2018, 2020-2021) and Kynetec (maize 2019-2021; cotton 2019).

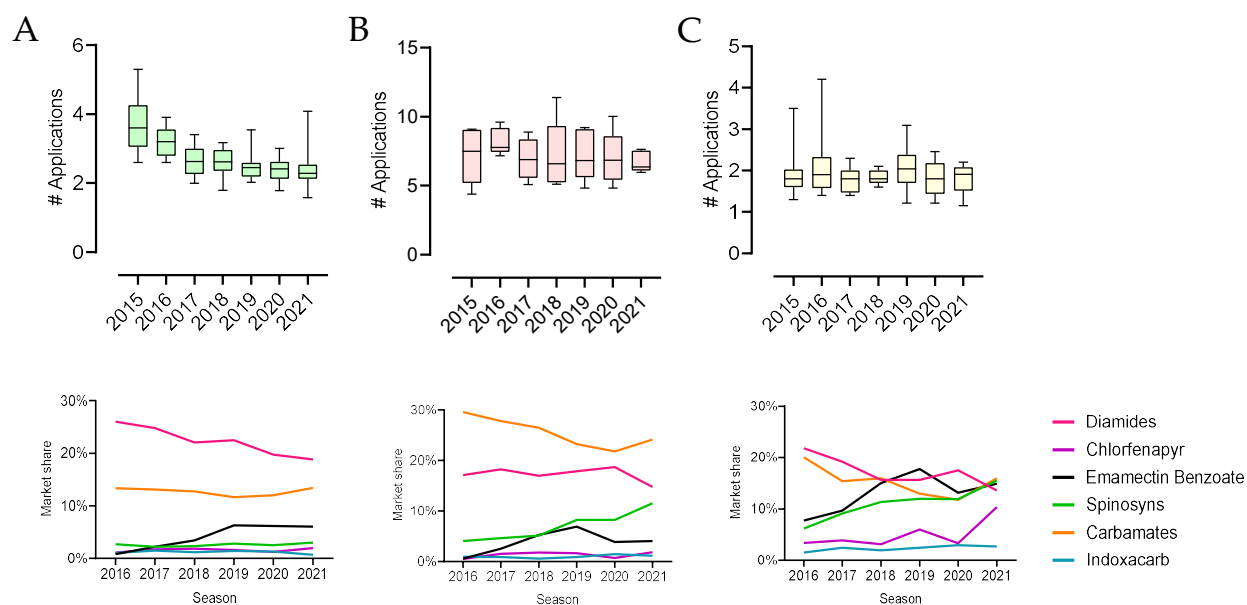

Supplement: s1 [file s1]
